# Supplementary material for: 104-week efficacy and safety of cipaglucosidase alfa plus miglustat in adults with late-onset Pompe disease: a phase III open-label extension study (ATB200-07)
Source: Springer Nature journal article supplement (doi:10.1007/s00415-024-12236-0), 2024-02-28
Supplement: MOESM1 [file 26795688]

## Supplementary material

### **104-week efficacy and safety of cipaglucoSIDase alfa plus miglustat in adults with late-onset Pompe disease: a phase III open-label extension study (ATB200-07)**

Benedikt Schoser,<sup>1</sup> Priya S. Kishnani,<sup>2</sup> Drago Bratkovic,<sup>3</sup> Barry J. Byrne,<sup>4</sup> Kristl G. Claeys,<sup>5</sup> Jordi Díaz-Manera,<sup>6</sup> Pascal Laforêt,<sup>7</sup> Mark Roberts,<sup>8</sup> Antonio Toscano,<sup>9</sup> Ans T. van der Ploeg,<sup>10</sup> Jeff Castelli,<sup>11</sup> Mitchell Goldman,<sup>11</sup> Fred Holdbrook,<sup>11</sup> Sheela Sitaraman Das,<sup>11</sup> Yasmine Wasfi,<sup>11</sup> Tahseen Mozaffar,<sup>12</sup> on behalf of the ATB200-07 study group

**Journal title:** *Journal of Neurology*

**Corresponding author:** Prof Dr med Benedikt Schoser; Friedrich-Baur-Institute at the Department of Neurology, LMU University Hospital, LMU Munich, Munich, Germany;  
[benedikt.schoser@med.uni-muenchen.de](mailto:benedikt.schoser@med.uni-muenchen.de)

## **Relationship between immunogenicity and safety in PROPEL and the OLE**

The association between immunogenicity endpoints and safety (adverse events [AEs], stratified by system organ class and infusion-associated reactions [IARs]), was evaluated by patient level analysis. The analyses were limited by the small numbers of patients who were negative for total anti-drug antibodies (ADA) and/or the small numbers of patients with AEs.

### **Relationship between AEs or IARs and ADAs or neutralizing antibodies (NABs)**

The mean number of AEs per patient with or without ADA or NABs at baseline or post-treatment (between-patients), and the AE per month rates before and after the onset of ADA or NABs (within-patients) were compared. None of these comparisons yielded statistically significant results, suggesting no apparent effects of these immunogenicity endpoints on the number of AEs per patient or the AE rates before versus after the patients became ADA positive.

Similarly, the mean number of IARs per patient with or without ADA or NABs at baseline or post-treatment (between-patients), and the IARs per month rates before and after the onset of ADA or NABs (within-patients) were compared. Certain between-patient analyses showed an association, but some conclusions were limited by the small numbers of patients who were negative for total ADA.

The majority of between-patient and within-patient analyses showed no or inconsistent effects. Overall, the weight of evidence does not support an association between these immunogenicity endpoints and the number of IARs per patient or the IAR rates before versus after the patients became ADA positive. Descriptive analyses of the relationship between ADA, including anti-recombinant human acid  $\alpha$ -glucosidase (rhGAA) immunoglobulin E (IgE), and IARs also showed that there was no clear trend in IAR occurrence with the incidence of anti-rhGAA IgE or with total ADA titers.

### **Relationship between IAR-TEAEs leading to study drug discontinuation and anti-rhGAA antibodies**

A total of five patients treated with cipa+mig experienced treatment-emergent AEs that were IARs leading to study drug discontinuation. All five patients had positive specific anti-rhGAA antibodies. Of these five patients, three discontinued after a serious IAR. Of these three patients, two had at least one positive result of anti-rhGAA IgE post-treatment with cipaglucoSIDase alfa, while one patient remained negative. Both patients who discontinued after a non-serious IAR had at least one positive result of anti rhGAA IgE post-treatment with cipaglucoSIDase alfa.

**Supplementary Table S1** Change in 6MWD (meters) from PROPEL baseline (OLE-ES population excluding outlier)

|                                               | ERT experienced |                |              |                | ERT naïve <sup>a</sup> |                |              |                |
|-----------------------------------------------|-----------------|----------------|--------------|----------------|------------------------|----------------|--------------|----------------|
|                                               | Cipa+mig group  |                | Switch group |                | Cipa+mig group         |                | Switch group |                |
|                                               | <i>n</i>        | Mean (SD)      | <i>n</i>     | Mean (SD)      | <i>n</i>               | Mean (SD)      | <i>n</i>     | Mean (SD)      |
| <b>6MWD, m</b>                                |                 |                |              |                |                        |                |              |                |
| <b>Baseline</b>                               | 62              | 342.4 (100.40) | 29           | 335.0 (116.03) | 20                     | 393.6 (112.39) | 7            | 420.9 (135.75) |
| <b>Week 104</b>                               | 56              | 367.1 (129.11) | 26           | 330.5 (142.54) | 18                     | 428.0 (107.74) | 7            | 469.3 (106.30) |
| <b>Change from PROPEL baseline in 6MWD, m</b> |                 |                |              |                |                        |                |              |                |
| <b>Week 12</b>                                | 61              | 10.9 (23.18)   | 29           | 5.3 (21.68)    | 19                     | 17.1 (20.97)   | 7            | 20.5 (22.12)   |
| <b>Week 26</b>                                | 55              | 12.9 (30.64)   | 27           | 5.6 (26.60)    | 17                     | 32.2 (36.75)   | 6            | 30.3 (17.94)   |
| <b>Week 38</b>                                | 58              | 13.3 (32.82)   | 28           | 4.0 (28.90)    | 20                     | 25.2 (46.25)   | 7            | 38.5 (19.46)   |
| <b>Week 52</b>                                | 61              | 16.3 (39.46)   | 29           | 0.7 (39.84)    | 20                     | 33.4 (48.70)   | 7            | 38.3 (29.32)   |
| <b>Week 64</b>                                | 55              | 14.2 (43.27)   | 27           | 5.7 (49.81)    | 18                     | 35.5 (47.65)   | 5            | 63.3 (49.66)   |
| <b>Week 78</b>                                | 56              | 19.8 (53.17)   | 26           | 0.8 (44.88)    | 19                     | 31.8 (47.83)   | 6            | 66.2 (49.47)   |
| <b>Week 104</b>                               | 56              | 14.2 (53.44)   | 26           | -8.8 (46.19)   | 18                     | 38.8 (51.03)   | 7            | 48.3 (70.56)   |

<sup>a</sup>Excludes outlier. *6MWD* 6-minute walk distance; *cipa+mig* cipa+glucosidase alfa+miglustat; *ERT* enzyme replacement therapy; *OLE-ES* open-label extension enrolled subjects; *SD* standard deviation

**Supplementary Table S2** Incidence of TEAEs occurring in  $\geq 10\%$  patients (in any group) by preferred term (safety population)

| Preferred term                    | Cipa+mig group (N = 85) <sup>a</sup> | Switch group (N = 37) <sup>b</sup> | Total patients treated with cipa+mig (N = 122) |
|-----------------------------------|--------------------------------------|------------------------------------|------------------------------------------------|
| Patients with any TEAE            | 84 (98.8)                            | 36 (97.3)                          | 120 (98.4)                                     |
| Fall                              | 35 (41.2)                            | 13 (35.1)                          | 48 (39.3)                                      |
| Headache                          | 30 (35.3)                            | 11 (29.7)                          | 41 (33.6)                                      |
| Arthralgia                        | 27 (31.8)                            | 10 (27.0)                          | 37 (30.3)                                      |
| Nasopharyngitis                   | 24 (28.2)                            | 1 (2.7)                            | 25 (20.5)                                      |
| Myalgia                           | 23 (27.1)                            | 7 (18.9)                           | 30 (24.6)                                      |
| Back pain                         | 19 (22.4)                            | 5 (13.5)                           | 24 (19.7)                                      |
| Pain in extremity                 | 17 (20.0)                            | 8 (21.6)                           | 25 (20.5)                                      |
| Diarrhea                          | 17 (20.0)                            | 3 (8.1)                            | 20 (16.4)                                      |
| Nausea                            | 16 (18.8)                            | 5 (13.5)                           | 21 (17.2)                                      |
| Fatigue                           | 15 (17.6)                            | 6 (16.2)                           | 21 (17.2)                                      |
| Oropharyngeal pain                | 15 (17.6)                            | 2 (5.4)                            | 17 (13.9)                                      |
| Musculoskeletal pain              | 14 (16.5)                            | 3 (8.1)                            | 17 (13.9)                                      |
| Urinary tract infection           | 14 (16.5)                            | 3 (8.1)                            | 17 (13.9)                                      |
| COVID-19                          | 14 (16.5)                            | 3 (8.1)                            | 17 (13.9)                                      |
| Pyrexia                           | 13 (15.3)                            | 2 (5.4)                            | 15 (12.3)                                      |
| Muscle spasm                      | 12 (14.1)                            | 2 (5.4)                            | 14 (11.5)                                      |
| Dizziness                         | 12 (14.1)                            | 2 (5.4)                            | 14 (11.5)                                      |
| Cough                             | 11 (12.9)                            | 1 (2.7)                            | 12 (9.8)                                       |
| Vaccination complication          | 11 (12.9)                            | 4 (10.8)                           | 15 (12.3)                                      |
| Upper respiratory tract infection | 10 (11.8)                            | 3 (8.1)                            | 13 (10.7)                                      |
| Abdominal pain                    | 8 (9.4)                              | 4 (10.8)                           | 12 (9.8)                                       |
| Contusion                         | 7 (8.2)                              | 6 (16.2)                           | 13 (10.7)                                      |

A TEAE was defined as any event that started on or after the first dose of respective study drug. Any AE that occurred after 30 days from last dose of study drug in PROPEL and before the first dose of study drug in ATB200-07 was not counted as treatment emergent. A patient experiencing the same TEAE multiple times was counted once for the corresponding preferred term. <sup>a</sup>Includes data from patients treated with cipa+mig in PROPEL who may or may not have continued cipa+mig in the OLE, including data from both PROPEL and the OLE; <sup>b</sup>Includes data from the OLE only. *AE* adverse event; *cipa+mig* cipaglucoisidase alfa+miglustat; *TEAE* treatment-emergent adverse event

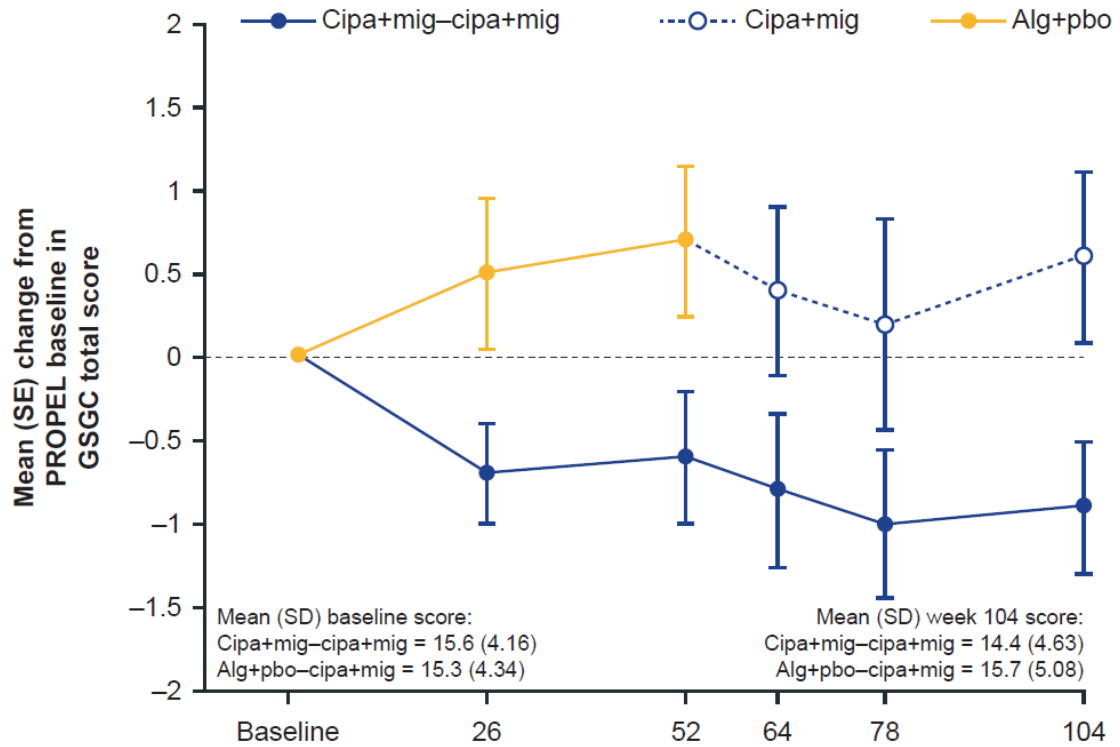

| Number of patients (n) | Weeks    |    |    |    |    |     |
|------------------------|----------|----|----|----|----|-----|
|                        | Baseline | 26 | 52 | 64 | 78 | 104 |
| Cipa+mig-cipa+mig      | 52       | 43 | 44 | 39 | 39 | 42  |
| Alg+pbo-cipa+mig       | 24       | 20 | 19 | 19 | 19 | 18  |

**Supplementary Fig. S1** Change from baseline in GSGC total score for ERT-experienced patients (OLE-ES population). *Alg+pbo* alglucosidase alfa+placebo; *cipa+mig* cipagluscosidase alfa+miglustat; *ERT* enzyme replacement therapy; GSGC Gait, Stair, Gowers' maneuver, Chair; *OLE-ES* open-label extension enrolled subjects; *SD* standard deviation; *SE* standard error

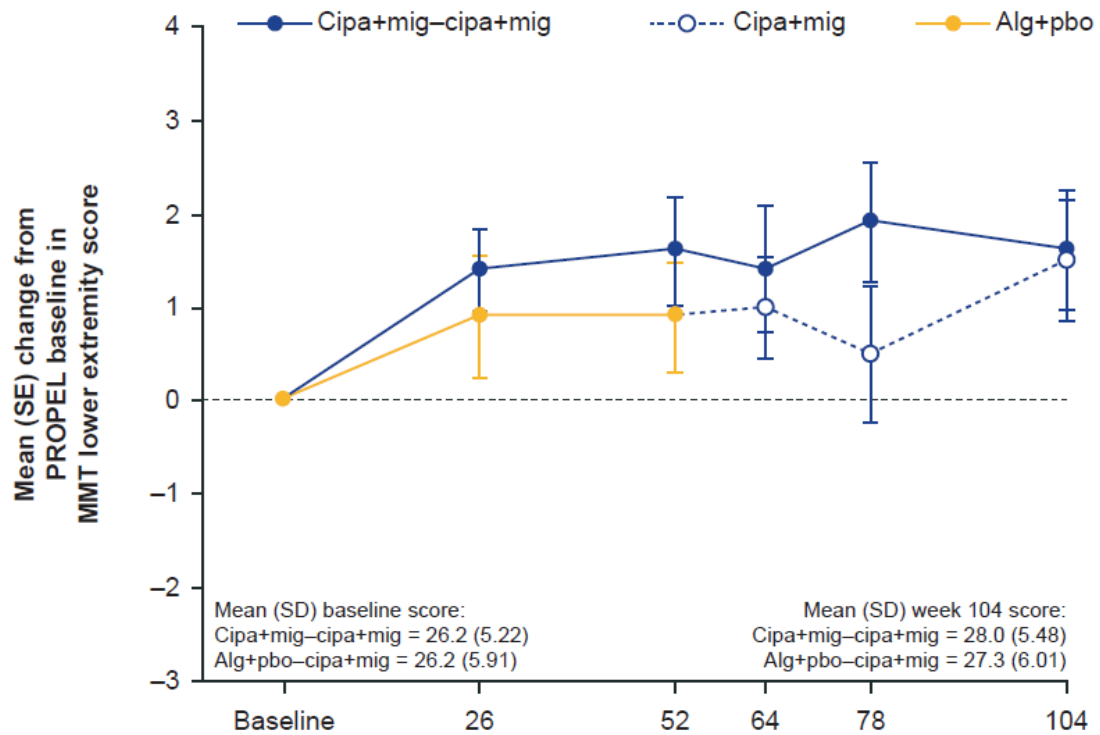

|                               | Baseline | 26 | 52 | 64 | 78 | 104 |
|-------------------------------|----------|----|----|----|----|-----|
| <b>Number of patients (n)</b> |          |    |    |    |    |     |
| Cipa+mig-cipa+mig             | 61       | 50 | 54 | 50 | 50 | 51  |
| Alg+pbo-cipa+mig              | 26       | 23 | 25 | 22 | 22 | 20  |

**Supplementary Fig. S2** Change from baseline in MMT lower extremity score for ERT-experienced patients (OLE-ES population). *Alg+pbo* alglucosidase alfa+placebo; *cipa+mig* cipaglucosidase alfa+miglustat; *ERT* enzyme replacement therapy; *MMT* manual muscle testing; *OLE-ES* open-label extension enrolled subjects; *SD* standard deviation; *SE* standard error

a

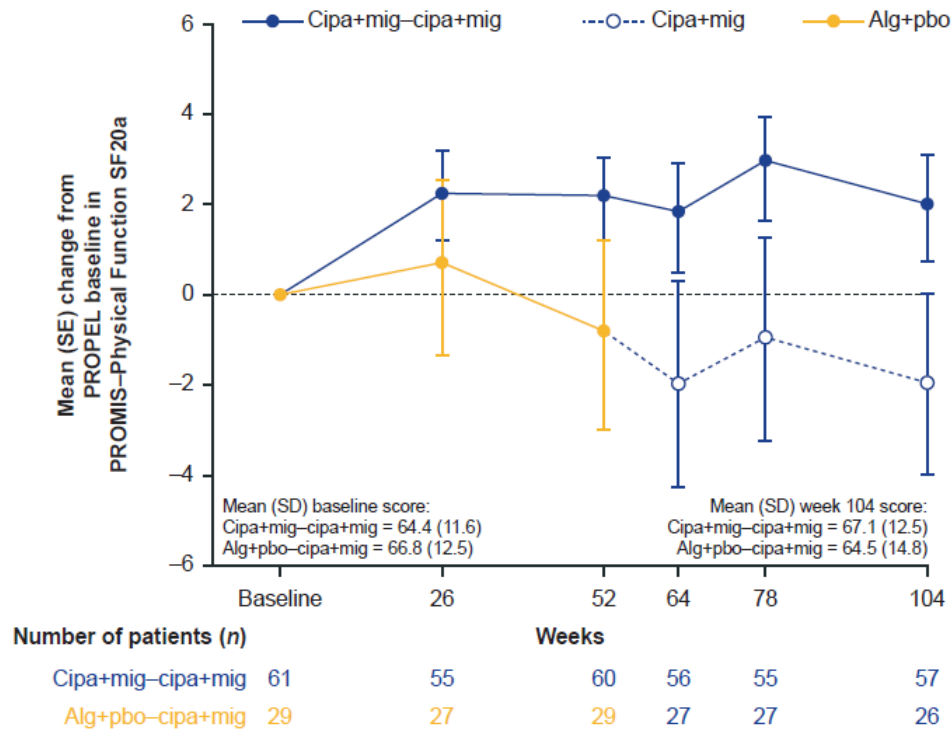

b

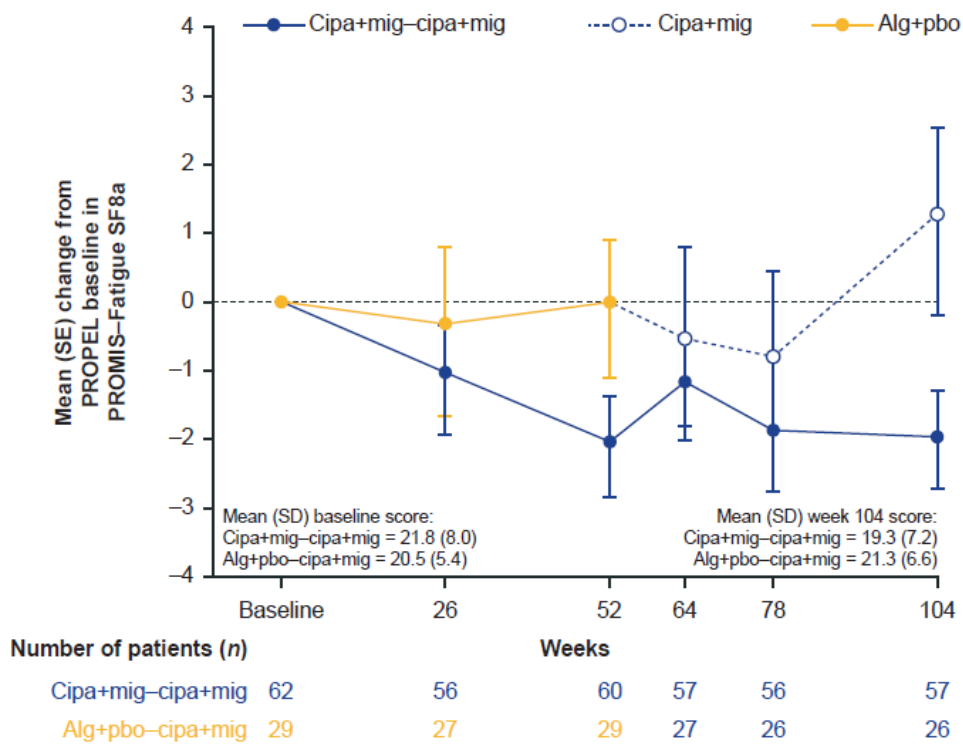

**Supplementary Fig. S3** Change from baseline in PROMIS–Physical Function SF20a (a) and PROMIS–Fatigue score SF8a (b) for ERT-experienced patients (OLE-ES population). *Note:* The total score ranges from 20 to 100 for PROMIS–Physical Function, with higher scores indicating less impact on physical function. The total score is calculated by summing up scores (1–5) across all 20 items. For PROMIS–Fatigue, the total score ranges from 8 to 40, with a lower score indicating less impact by fatigue and is calculated by summing up scores (1–5) across all 8 items. If baseline scores were partially missing (missing only specific items), the missing item scores were imputed with the average of all non-missing values for the specific items (from both treatment groups combined). The item scores (observed and imputed) were then summed up as the baseline total score. If baseline scores were completely missing, baseline total score was imputed with the average of all observed baseline total scores (from both treatment groups combined), provided there was  $\geq 1$  post-baseline total score. Item scores were not imputed in this case. If post-baseline scores were partially missing but  $\geq 50\%$  of items were available, the total score was calculated as the average of non-missing items multiplied by the total number of items expected. If post-baseline scores were completely missing or  $< 50\%$  of items were available, the total score was not calculated and set to missing.’ The baseline is the last non-missing value on or prior to the administration of the first dose of study drug in PROPEL. *Alg+pbo* alglucosidase alfa+placebo; *cipa+mig* cipaglucosidase alfa+miglustat; *ERT* enzyme replacement therapy; *OLE-ES* open-label extension enrolled subjects; *PROMIS* Patient-Reported Outcomes Measurement Information System; *SD* standard deviation; *SE* standard error



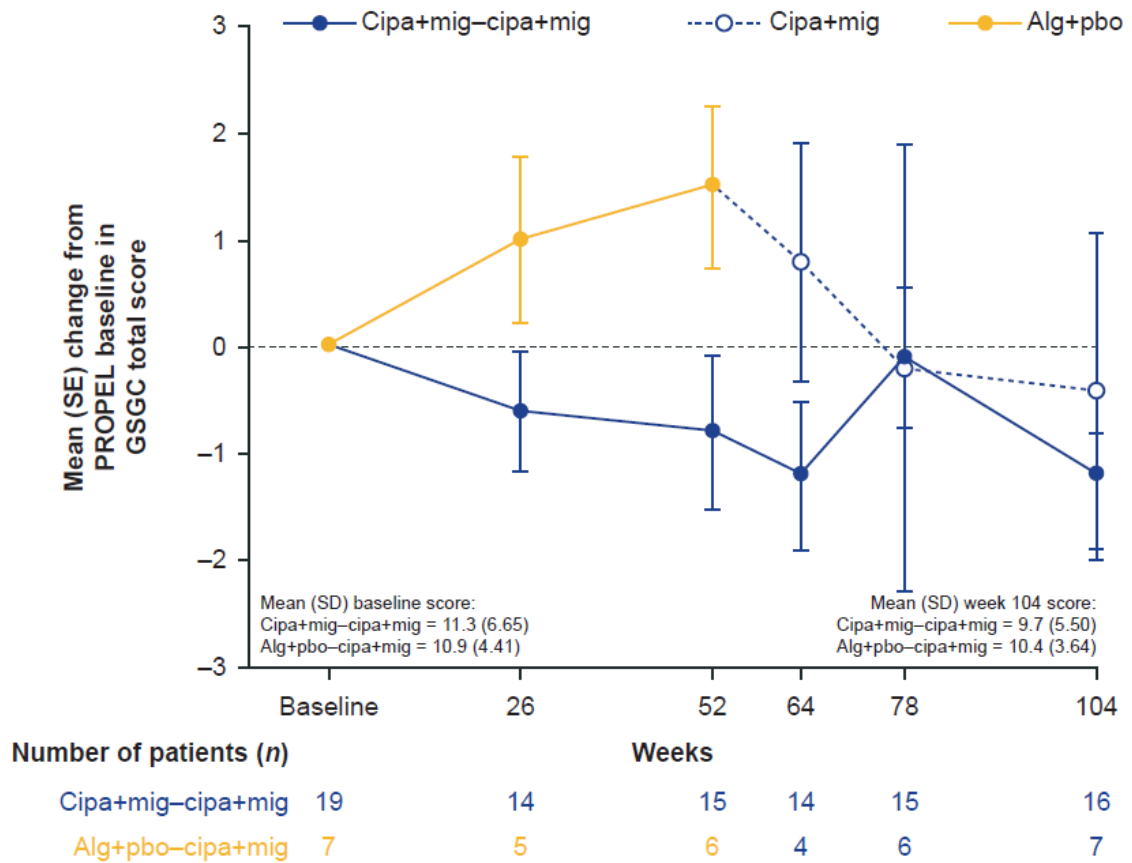

**Supplementary Fig. S4** Change from baseline in GSGC total score for ERT-naïve patients (OLE-ES population excluding outlier). *Alg+pbo* alglucosidase alfa+placebo; *cipa+mig* cipagluscosidase alfa+miglustat; *ERT* enzyme replacement therapy; *GSGC* Gait, Stairs, Gowers' maneuver, Chair; *OLE-ES* open-label extension enrolled subjects; *SD* standard deviation; *SE* standard error

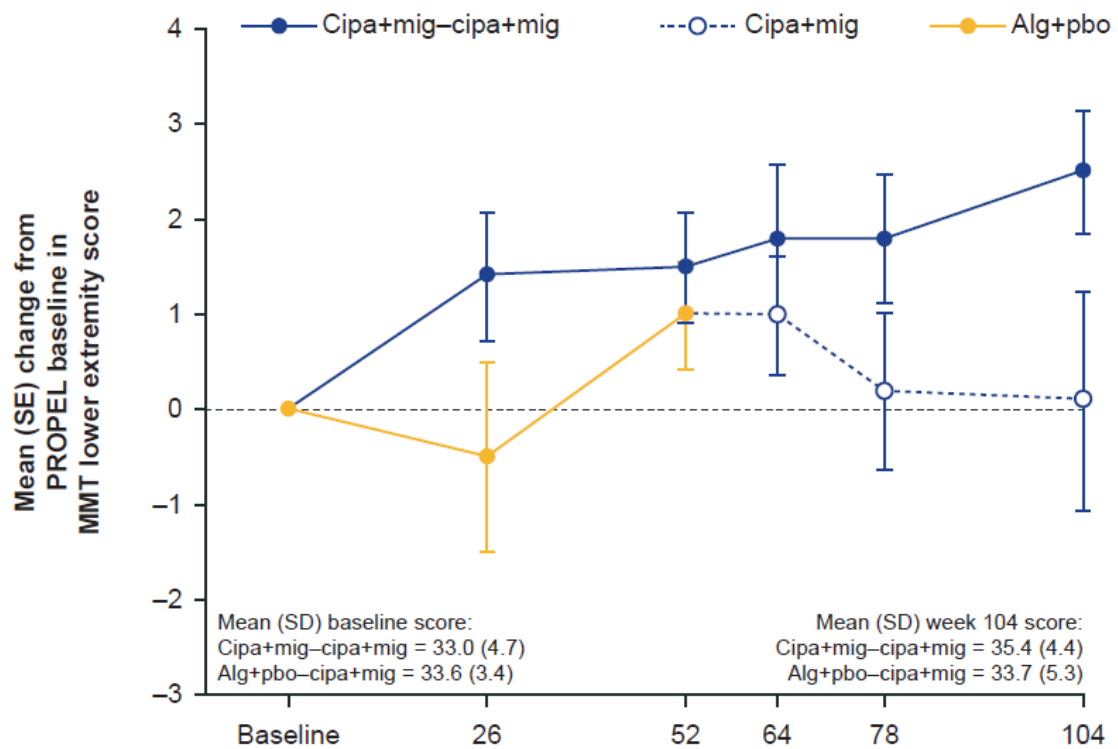

| Number of patients (n) | Weeks |    |    |    |    |    |
|------------------------|-------|----|----|----|----|----|
| Cipa+mig-cipa+mig      | 20    | 17 | 17 | 17 | 18 | 17 |
| Alg+pbo-cipa+mig       | 7     | 6  | 7  | 5  | 6  | 7  |

**Supplementary Fig. S5** Change from baseline in MMT lower extremity score for ERT-naïve patients (OLE-ES population excluding outlier). *Alg+pbo* alglucosidase alfa+placebo; *cipa+mig* cipaglucosidase alfa+miglustat; *ERT* enzyme replacement therapy; *MMT* manual muscle testing; *OLE-ES* open-label extension enrolled subjects; *SD* standard deviation; *SE* standard error

a

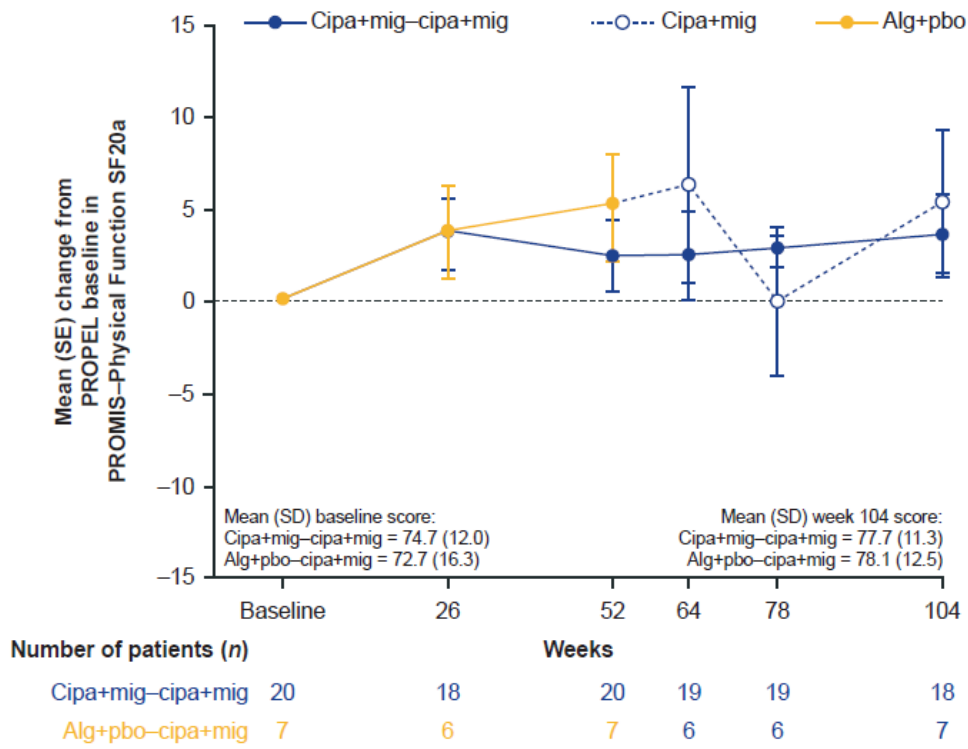

b

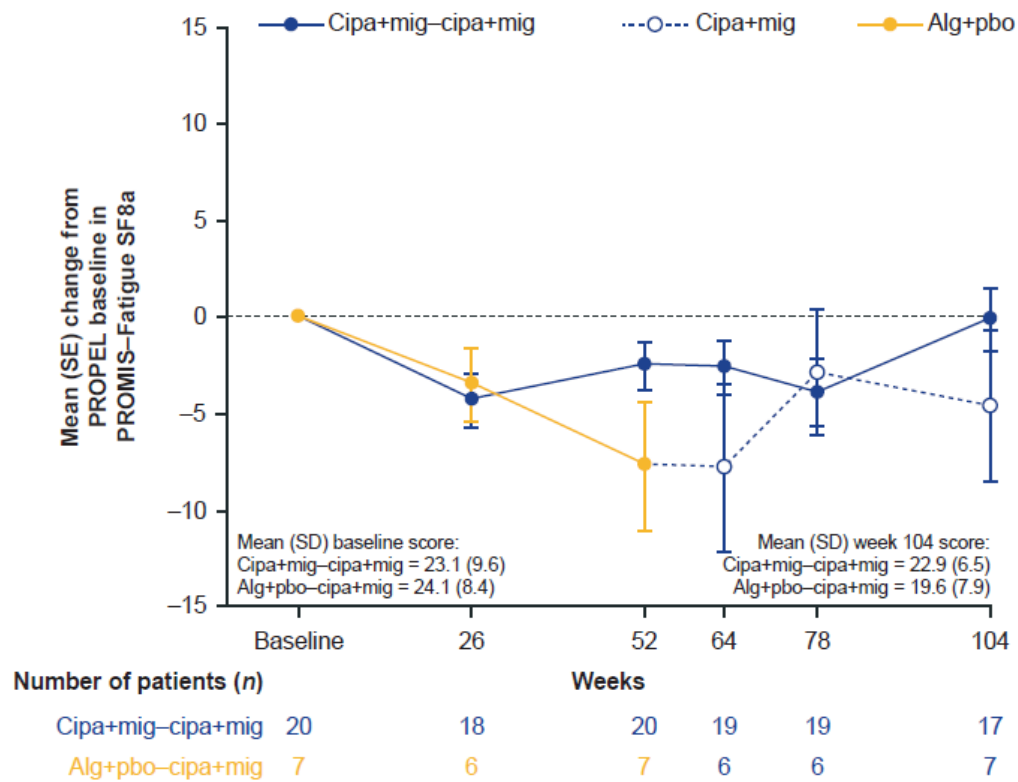

**Supplementary Fig. S6** Change from baseline in PROMIS–Physical Function SF20a (a) and PROMIS–Fatigue score SF8a (b) for ERT-naïve patients (OLE-ES population excluding outlier). *Alg+pbo* alglucosidase alfa+placebo; *cipa+mig* cipaglucosidase alfa+miglustat; *ERT* enzyme replacement therapy; *OLE-ES* open-label extension enrolled subjects; *PROMIS* Patient-Reported Outcomes Measurement Information System; *SD* standard deviation; *SE* standard error
